# Supplementary material
Source: PubMed Central journal article supplement (PMC2786694)
Supplement: supp_29_23_6170__1.pdf [file supp_29_23_6170__1.pdf]

## Supplemental Figures

**Fig. S1**

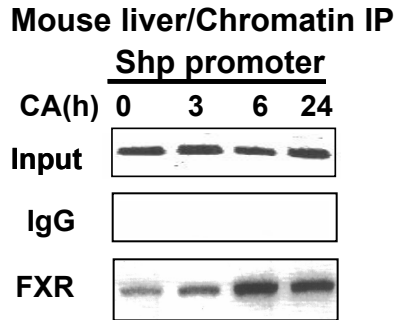

**Fig. S2**

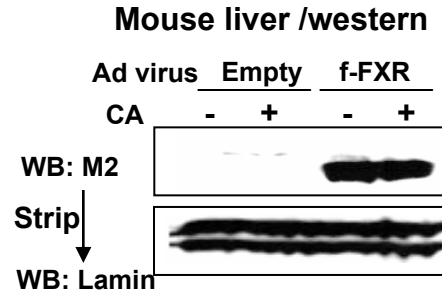

**Fig. S3**

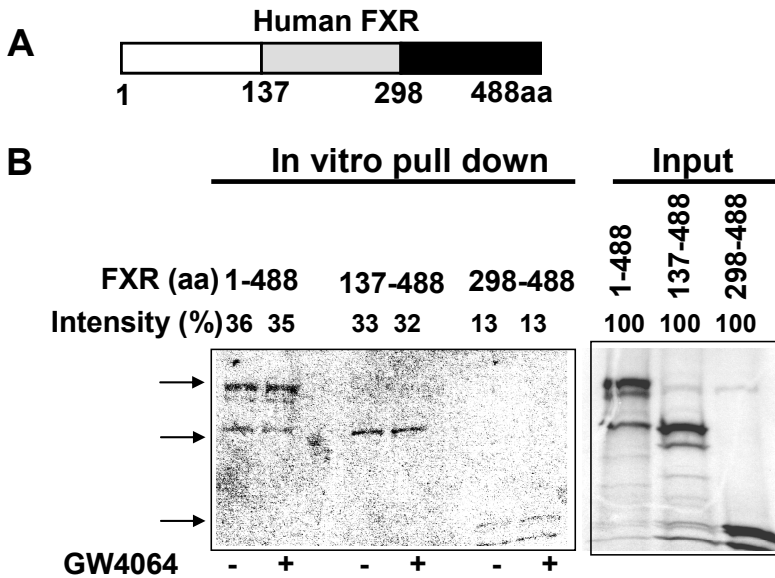

**Fig. S4**

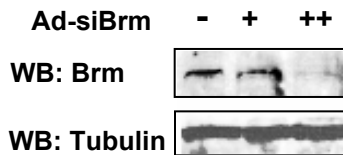

**Fig. S5**

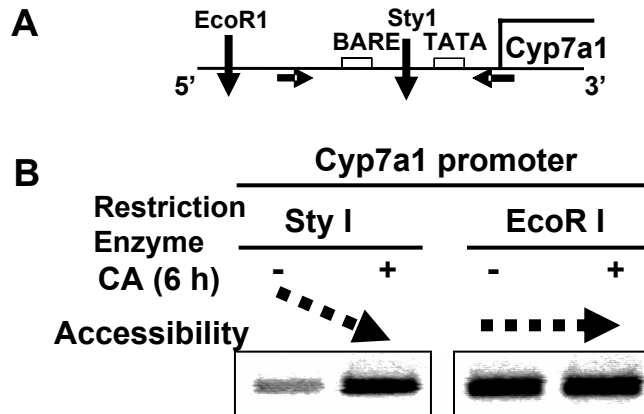

## Supplemental Figure legends

**Fig. S1. Association of FXR with the Shp promoter is increased after CA feeding in mouse liver.** Mice were fed normal chow (-) or chow supplemented with 0.5% cholic acid (CA) for indicated times and CHIP analysis was performed as described in Materials and Methods to detect association of FXR with the Shp promoter.

**Fig. S2. Flag-FXR is ectopically expressed in mouse liver using adenoviral delivery.** Mice were infected with adenovirus expressing flag-FXR or control Ad-empty and 5 days after infection, mice were fed either normal chow or chow supplemented with 0.5 % cholic acid (CA chow) for 3 hr and livers were collected for western analysis. Flag-FXR levels were detected by M2 antibody and the membrane was stripped and reprobed with lamin antibody.

**Fig. S3. Brg-1 directly interacts with FXR in vitro.** (A) Schematic diagram of human FXR sequences. (B) Flag-Brg-1 was overexpressed in Cos-1 cells, isolated by M2 agarose, and further subjected to in vitro protein interaction studies. Briefly, <sup>35</sup>S-full length FXR or deleted FXR fragments were synthesized by in vitro transcription and translation and were incubated with M2 agarose in the absence (-) or presence (+) of GW4064. The radioactive proteins were separated by SDS-PAGE followed by autoradiography. Band intensities were determined using Image J and the values for input samples were set to 1.

**Fig. S4. Efficient down-regulation of endogenous Brm in hepatic cells by infection with adenoviral vectors expressing siRNA for Brm** Mouse Hepa1c1c7 cells were infected with increasing amounts of Ad-si-mouse Brm and endogenous Brm and control tubulin levels were detected by western analysis.

**Fig. S5. Accessibility of the DNA in the Cyp7a1 promoter chromatin to endonucleases is decreased after CA feeding.** Mice were fed normal (-) or CA chow (+) for 6 hr and nuclei were isolated from livers and partially digested by each of indicated endonucleases. Genomic DNA was purified and subjected to PCR analysis using the primers specific for the Cyp7a1 promoter. Decreased accessibility is indicated by a down-ward dotted arrow.
